# Supplementary material
Source: PubMed Central journal article supplement (PMC5012473)
Supplement: CJN.00910116SupplementaryData.pdf [file CJN.00910116SupplementaryData.pdf]

**Supplementary Figure 1. Flow Diagram of Patient Enrollment and Exclusion**

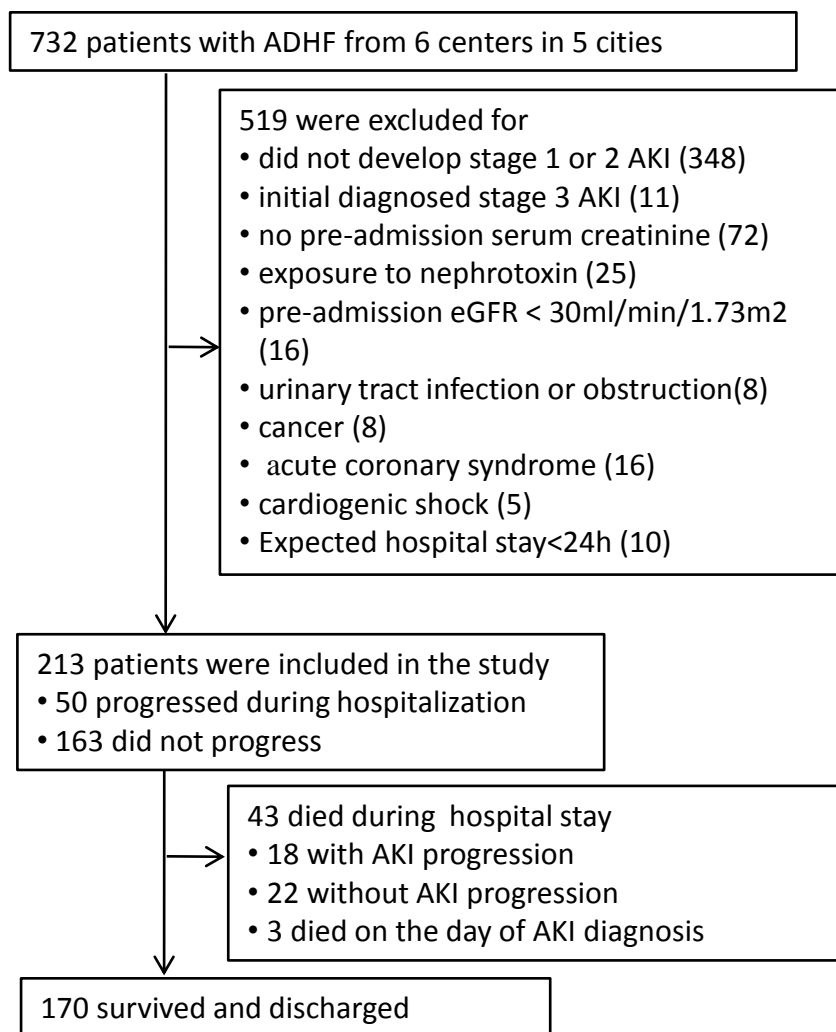

**Supplemental Table 1. Biomarkers for predicting AKI progression: multivariate logistic regression analyses using the non-normalized data <sup>a</sup>**

| Biomarker            | Cut Points | N  | AKI Progression (%) | Unadjusted OR (95%CI) | P      | Adjusted OR <sup>b</sup> (95%CI) | P      |
|----------------------|------------|----|---------------------|-----------------------|--------|----------------------------------|--------|
| <b>uAGT, ng/ml</b>   |            |    |                     |                       |        |                                  |        |
| Low (T1)             | 0.01-15.8  | 71 | 8.5                 | 1 (referent)          | <0.001 | 1 (referent)                     | <0.001 |
| Medium (T2)          | 15.9-102.4 | 71 | 18.3                | 2.4 (0.9-6.8)         |        | 2.8 (0.9-8.5)                    |        |
| High (T3)            | >102.4     | 71 | 43.7                | 8.4 (3.2-21.9)        |        | 10.4 (3.6-30.9)                  |        |
| <b>uNGAL, ng/ml</b>  |            |    |                     |                       |        |                                  |        |
| Low (T1)             | 0.1-30.1   | 71 | 9.9                 | 1 (referent)          | <0.001 | 1 (referent)                     | 0.009  |
| Medium (T2)          | 30.2-94.0  | 68 | 20.6                | 2.4 (0.9-6.3)         |        | 2.1 (0.7-6.0)                    |        |
| High (T3)            | >94        | 74 | 39.2                | 5.8 (2.3-14.6)        |        | 4.5 (1.7-11.9)                   |        |
| <b>uIL-18, pg/ml</b> |            |    |                     |                       |        |                                  |        |
| Low (T1)             | 1.4-16.4   | 70 | 14.3                | 1 (referent)          | <0.001 | 1 (referent)                     | 0.002  |
| Medium (T2)          | 16.5-178.1 | 73 | 13.7                | 0.9 (0.4-2.5)         |        | 0.8 (0.3-2.1)                    |        |
| High (T3)            | >178.1     | 70 | 42.9                | 4.5 (2.0-10.2)        |        | 3.1 (1.3-7.6)                    |        |

<sup>a</sup> AKI progression is defined as worsening of AKI stage (from stage 1 to either stage 2 or 3 or from stage 2 to 3).

Biomarkers are measured at the time of stage 1 or 2 AKI diagnosis.

<sup>b</sup> Adjusted for age, gender, hypertension, diabetes, pre-admission eGFR, NT-proBNP, serum albumin, hemoglobin, diuretic dosage before AKI, use of spironolactone before AKI, use of RAS inhibitors before AKI, and change of serum creatinine from baseline at the time of AKI diagnosis. Site is adjusted as a random effect.

**Abbreviations:** OR, odds ratio; T, tertile; RAS, renin-angiotensin system.

**Supplemental Table 2. Biomarkers for predicting AKI progression: multivariate logistic regression analysis using levels of the biomarkers as the continuous variables.**

| Biomarkers      | Unadjusted odds ratio | 95%CI   | P      | Adjusted odds ratio | 95%CI   | P      |
|-----------------|-----------------------|---------|--------|---------------------|---------|--------|
| uAGT, µg/g Cr   | 4.8                   | 2.5-8.9 | <0.001 | 4.7                 | 2.3-9.6 | <0.001 |
| uNGAL, µg/g Cr  | 2.6                   | 1.8-3.7 | <0.001 | 2.8                 | 1.8-4.5 | <0.001 |
| uIL-18, ng/g Cr | 2.7                   | 1.8-3.9 | <0.001 | 2.4                 | 1.6-3.7 | <0.001 |

Results are presented as per SD increment in the log values, adjusted for age, gender, hypertension, diabetes, pre-admission eGFR, NT-proBNP, serum albumin, hemoglobin, diuretic dosage before AKI, use of spironolactone before AKI, use of RAS inhibitors before AKI, and change of serum creatinine from baseline at the time of AKI diagnosis

**Supplemental Table 3. Performance of urinary biomarkers for predicting AKI progression and/or death in total cohort**

| Biomarkers | AUC  | 95%CI     | P      |
|------------|------|-----------|--------|
| uAGT       | 0.71 | 0.63-0.78 | <0.001 |
| uNGAL      | 0.70 | 0.62-0.77 | <0.001 |
| uIL-18     | 0.65 | 0.56-0.73 | <0.001 |
